# Supplementary material for: Modulation of intestinal epithelial cell proliferation and apoptosis by Lactobacillus gasseri SF1183
Source: Springer Nature journal article supplement (doi:10.1038/s41598-022-24483-0), 2022-11-24
Supplement: MOESM1 [file 41598_2022_24483_MOESM1_ESM.pdf]

# **RAW DATA**

## **SUPPLEMENTARY INFORMATIONS**

### **Modulation of intestinal epithelial cell proliferation and apoptosis by *Lactobacillus gasseri* SF1183**

Blanda Di Luccia<sup>°#</sup>, Vittoria Acampora<sup>°</sup>, Anella Saggese<sup>°</sup>, Viola Calabrò<sup>°</sup>,  
Maria Vivo<sup>°^</sup>, Tiziana Angrisano<sup>°</sup>, Loredana Baccigalupi<sup>°°</sup>, Ezio Ricca<sup>°\*</sup>,  
Alessandra Pollice <sup>°\*</sup>

<sup>°</sup>Department of Biology and <sup>°°</sup>Department of Molecular Medicine and Medical Biotechnology, Federico II  
University, Naples, Italy

<sup>^</sup>Department of Chemistry and Biology A. Zambelli, University of Salerno, Salerno, Italy

<sup>#</sup>Department of Microbiology and Immunology, Stanford University- School of Medicine, Stanford, CA, USA

**\* corresponding authors:**

[apollice@unina.it](mailto:apollice@unina.it)

[ericca@unina.it](mailto:ericca@unina.it)

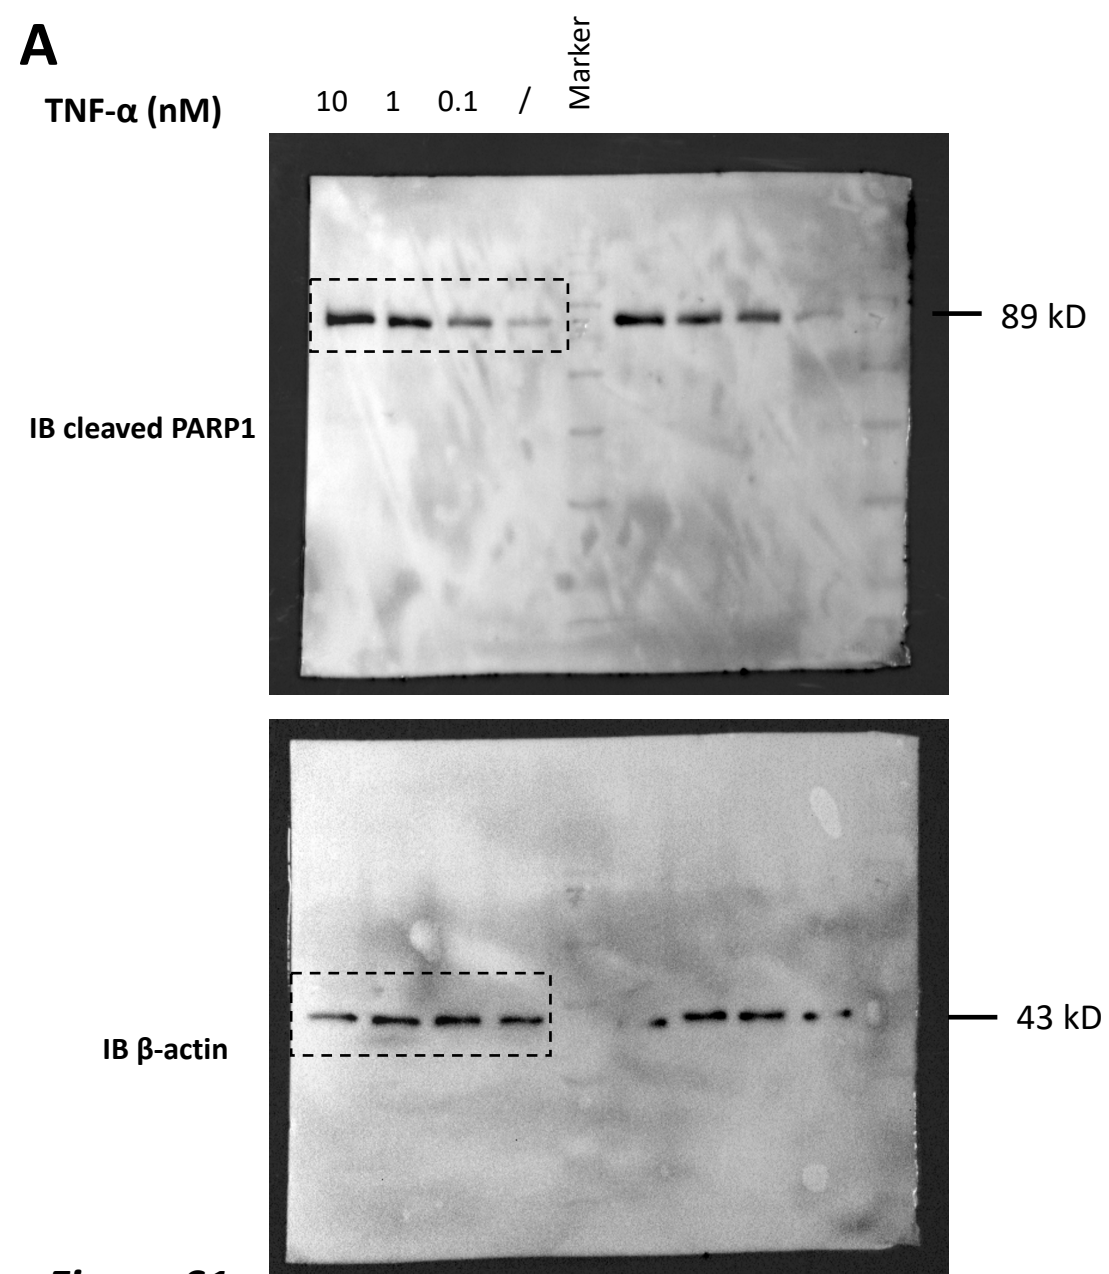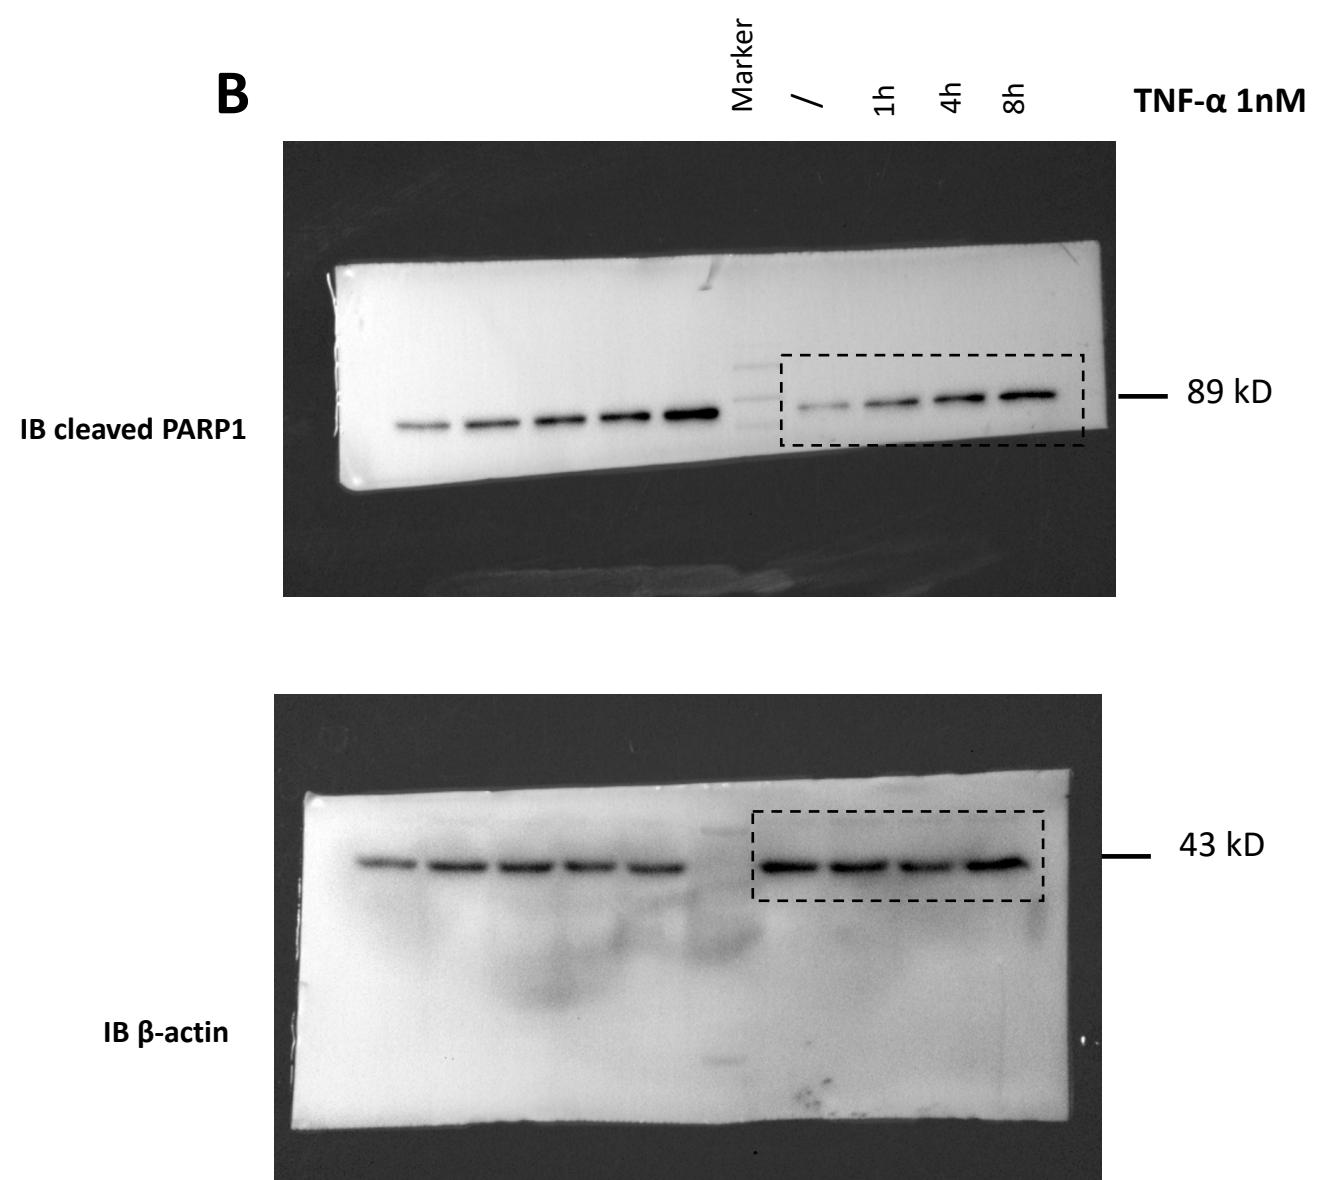

**Figure S1**

Full-length western blots images of cropped immunoblot of **Figure 1A and B**. Dashed squares correspond to the bands showed in the ultimate panels in the manuscript. In A bands were also horizontally flipped.

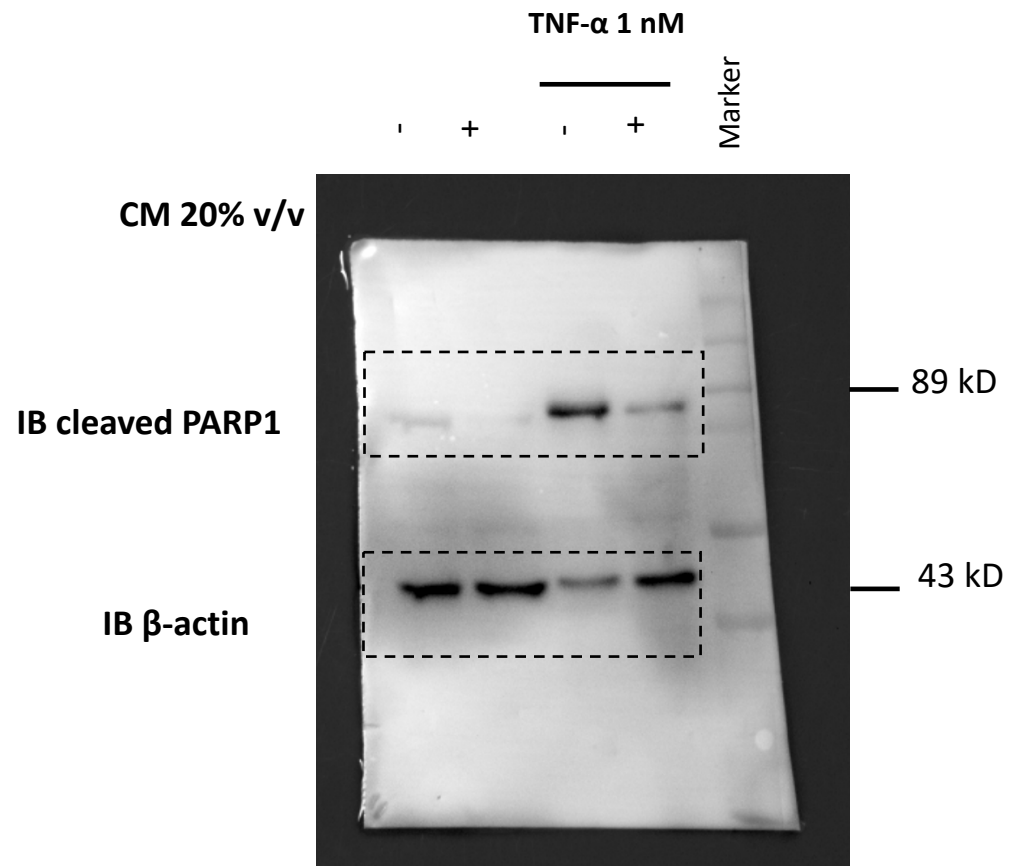

**Figure S2**

Full-length western blots images of cropped immunoblot of **Figure 2A**. Dashed squares correspond to the bands showed in the ultimate panels in the manuscript.

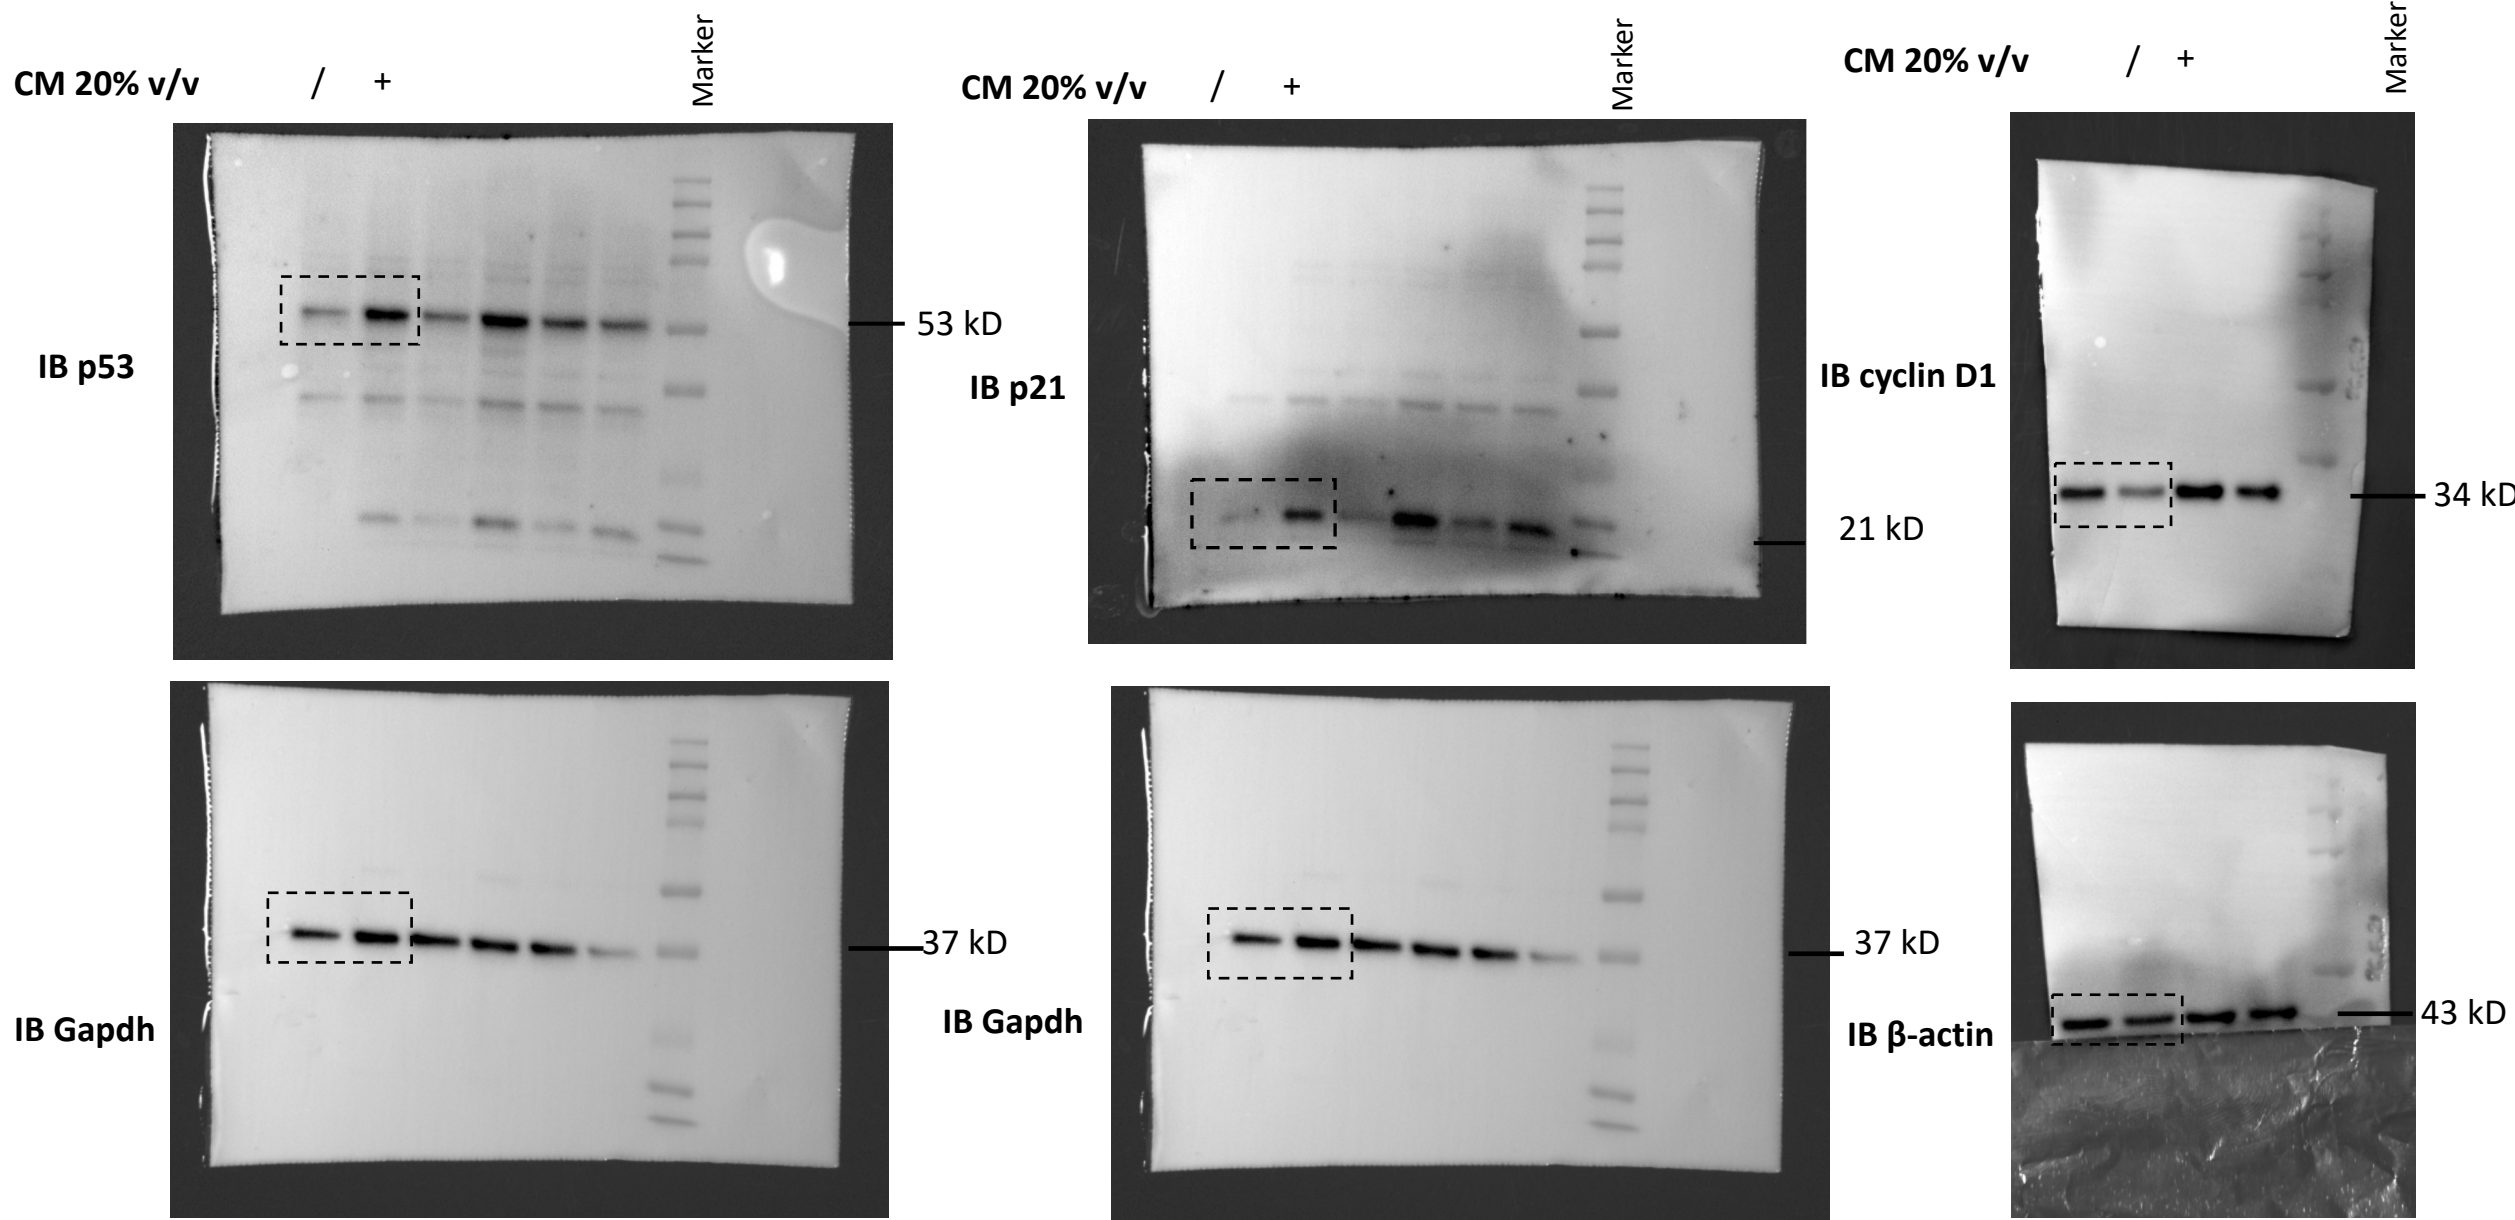

**Figure S3**

Full-length western blots images of cropped immunoblot of **Figure 3C**. Dashed squares correspond to the bands showed in the ultimate panels in the manuscript.



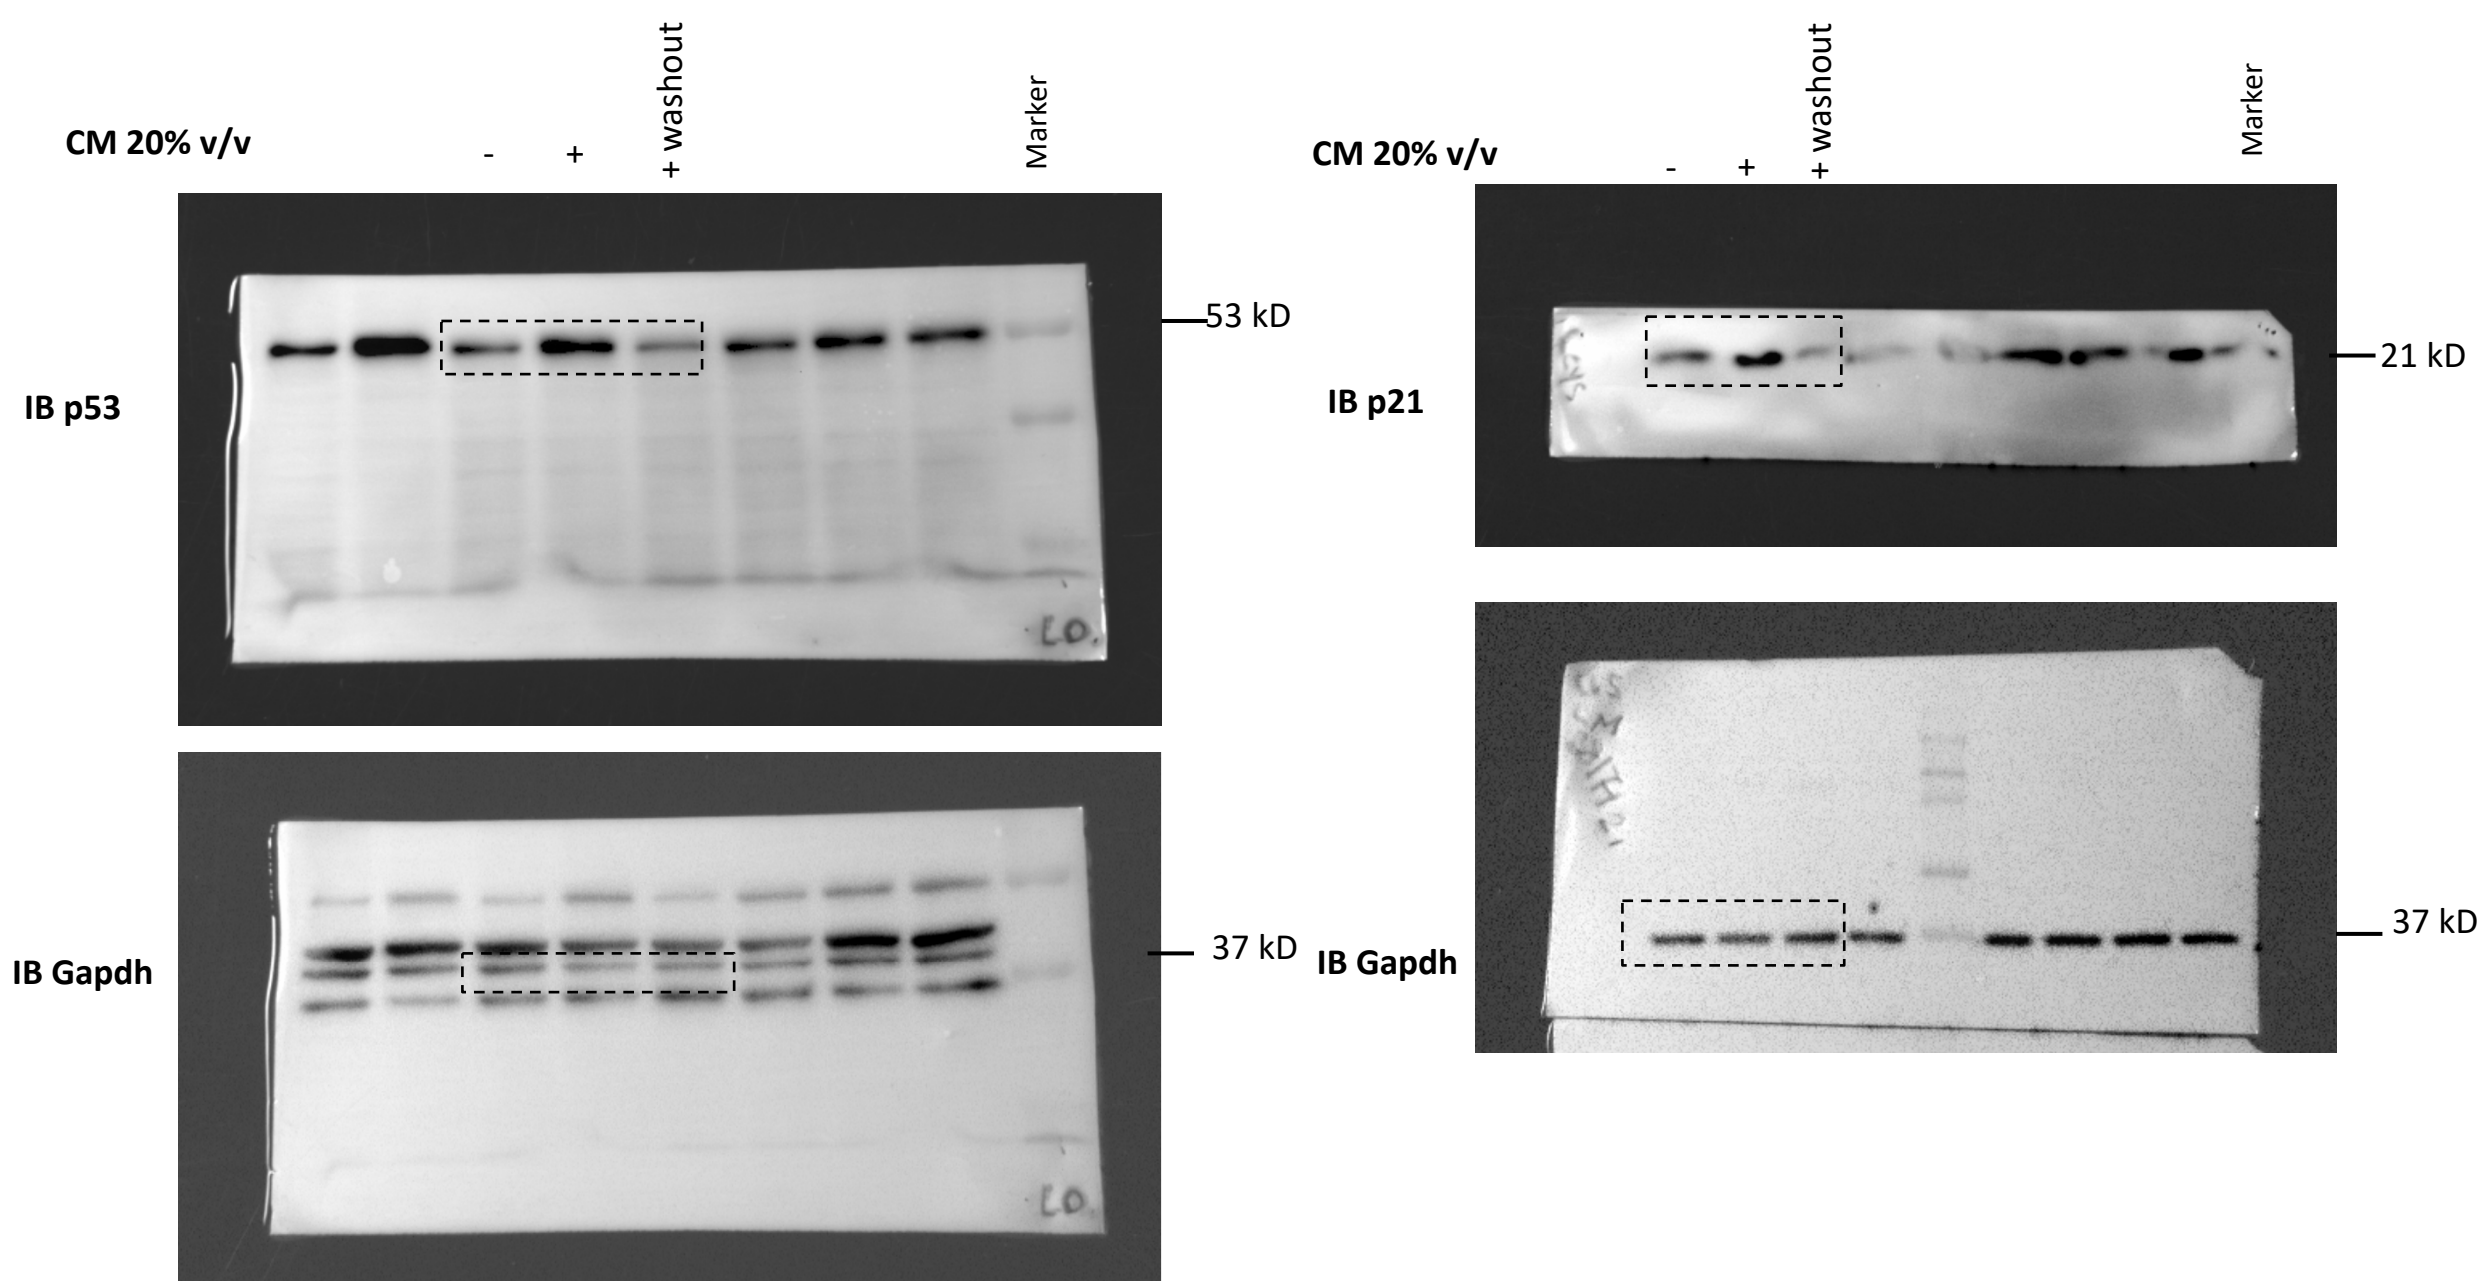

**Figure S4**  
Full-length western blots images of cropped immunoblot of **Figure 4B**. Dashed squares correspond to the bands showed in the ultimate panels in the manuscript.

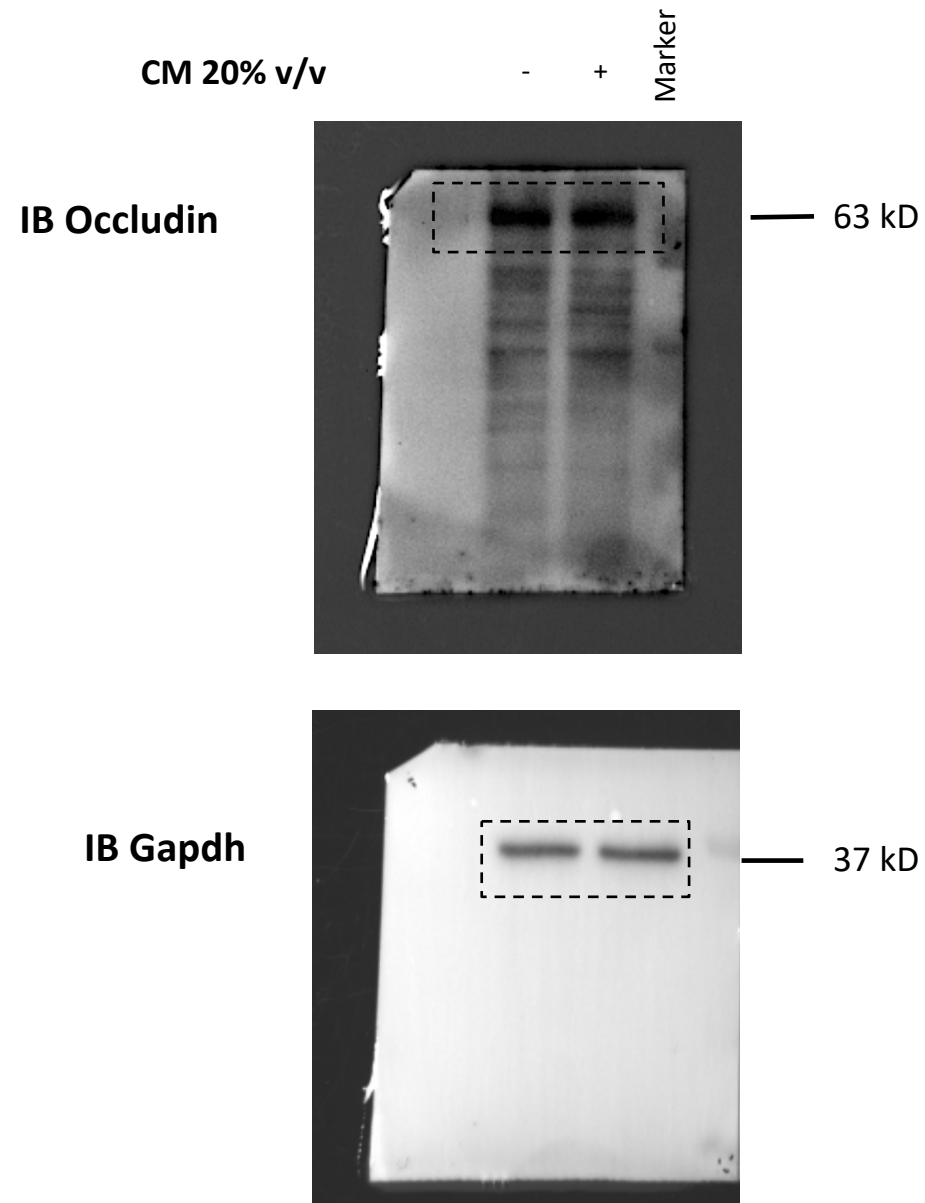

**Figure S5**

Full-length western blots images of cropped immunoblot of **Figure 5B**. Dashed squares correspond to the bands showed in the ultimate panels in the manuscript.

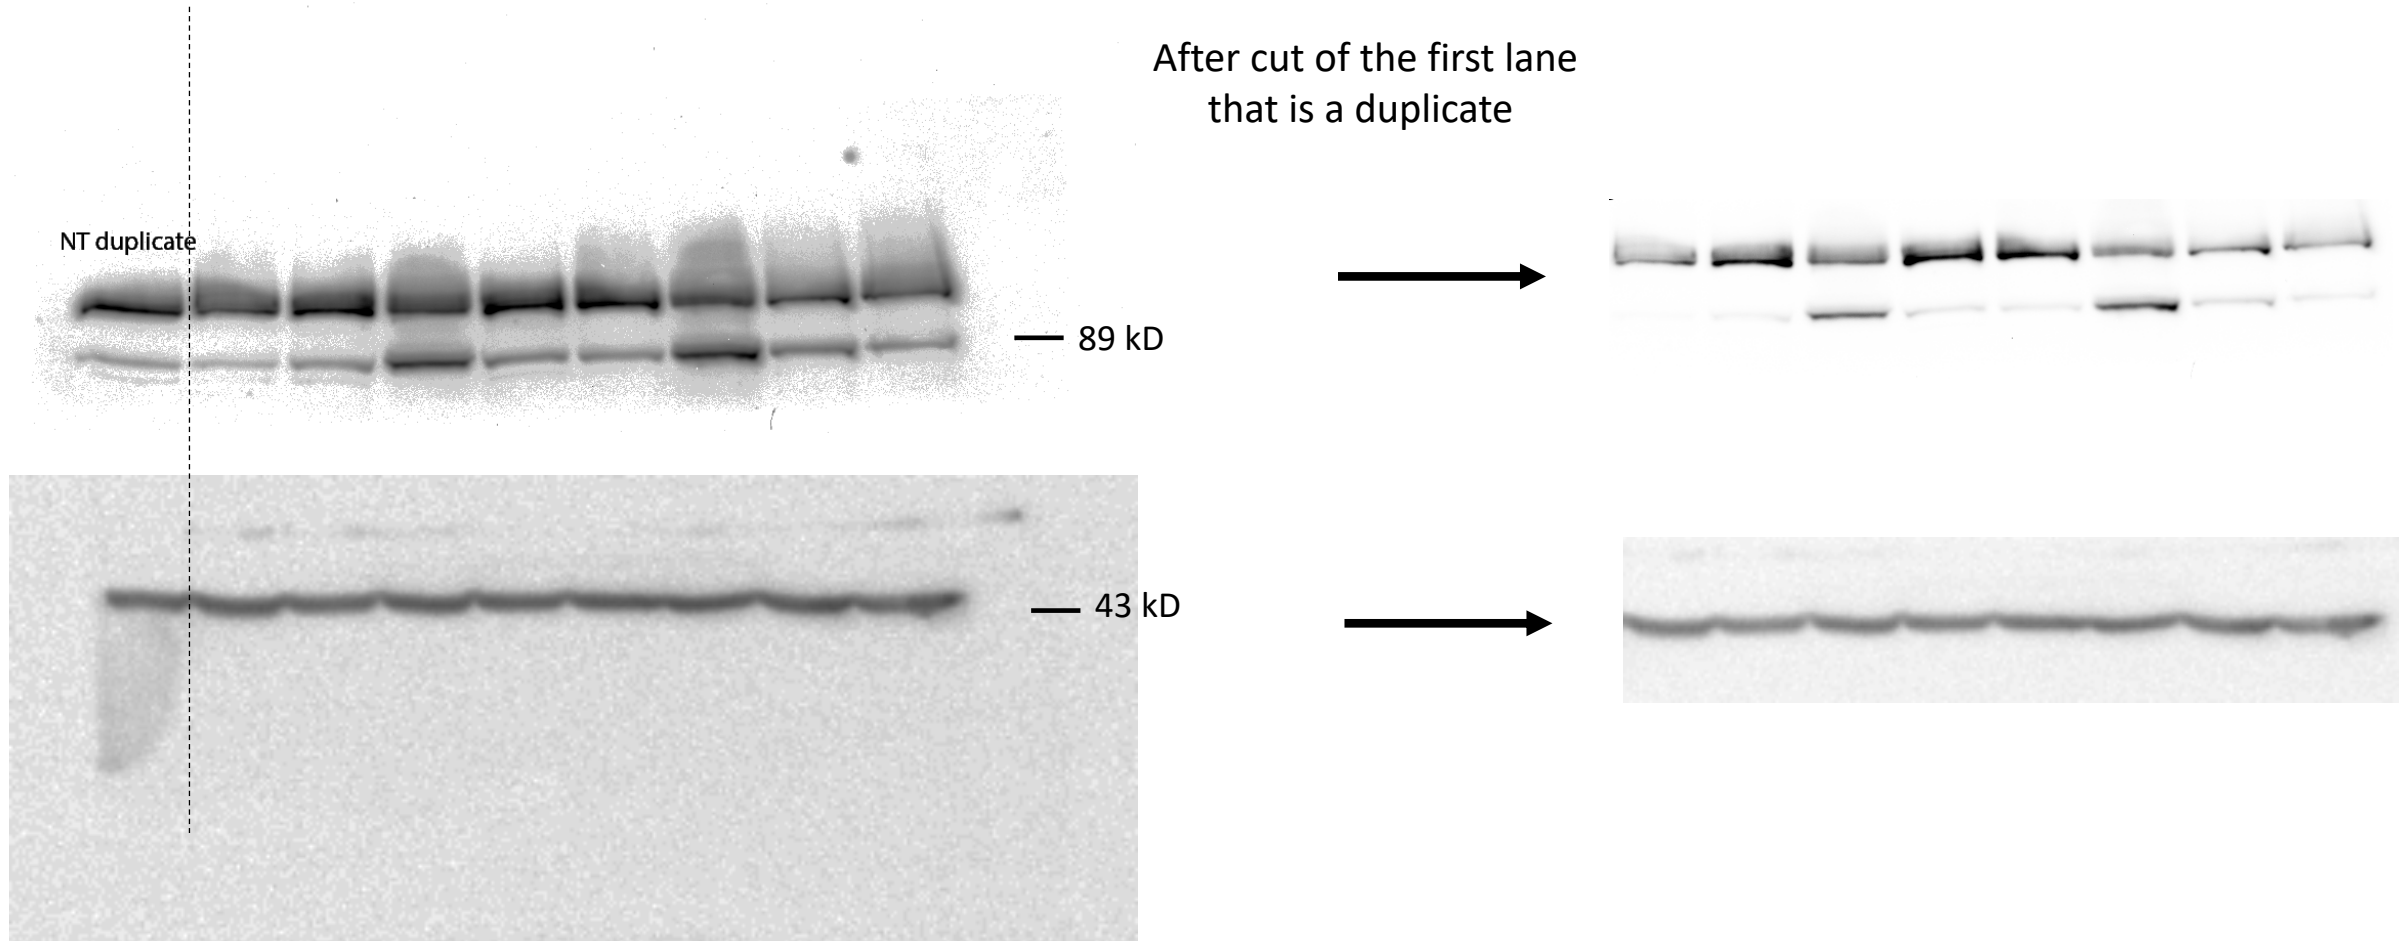

**Figure S6**

Full-length western blots images of cropped immunoblot of **Supplementary Figure 1 Part A**. Dashed squares correspond to the bands showed in the ultimate panels in the manuscript.

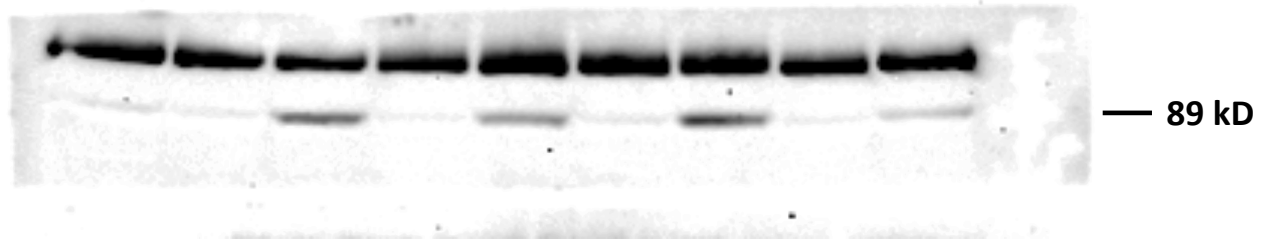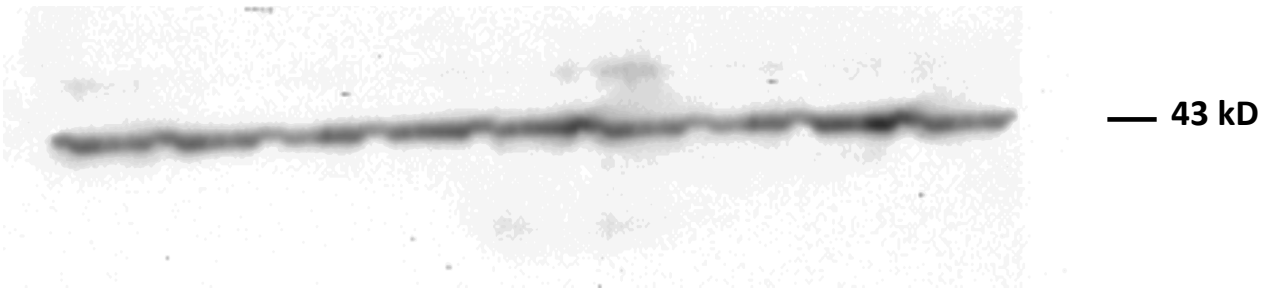

**Figure S7**

Full-length western blots images of cropped immunoblot of **Supplementary Figure 1 Part B**. Dashed squares correspond to the bands showed in the ultimate panels in the manuscript.
